# Supplementary material
Source: PubMed Central journal article supplement (PMC6191381)
Supplement: NIHMS959565-supplement-Supp_info.pdf [file NIHMS959565-supplement-Supp_info.pdf]

Supplementary Material:

Increased flexibility in the use of exogenous lipoic acid by *Staphylococcus aureus*

Irina Laczkovich, Wei Ping Teoh, Sarah Flury, James P. Grayczyk, Azul Zorzoli, and Francis Alonzo III\*

Department of Microbiology and Immunology, Loyola University Chicago – Stritch School of Medicine, 2160 S. First Avenue, Maywood, IL 60153, USA

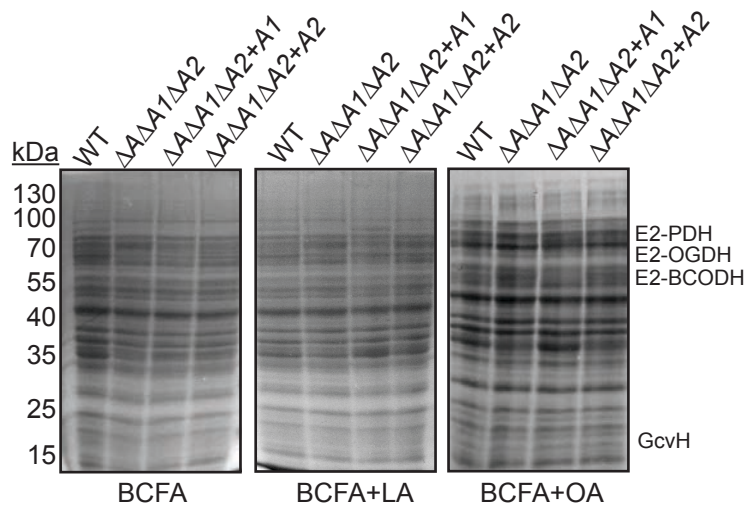

**Figure S1. Loading controls related to Figure 2.** Coomassie blue stained SDS-PAGE gels of whole cell lysates derived from the indicated strains grown in RPMI supplemented with branched chain carboxylic acids (10 mM isobutyric acid, 9 mM 2-methylbutyric acid, 9 mM isovaleric acid, and 10 mM sodium acetate - BCFA) in order to bypass the requirement of lipoic acid for replication with or without 5  $\mu$ M lipoic acid (LA) and 150  $\mu$ M octanoic acid (OA). Strain designations are as follows: Wildtype (WT),  $\Delta lipA \Delta lplA1 \Delta lplA2$  ( $\Delta A \Delta A1 \Delta A2$ ),  $\Delta lipA \Delta lplA1 \Delta lplA2 + lplA1$  ( $\Delta A \Delta A1 \Delta A2 + A1$ ), and  $\Delta lipA \Delta lplA1 \Delta lplA2 + lplA2$  ( $\Delta A \Delta A1 \Delta A2 + A2$ ).

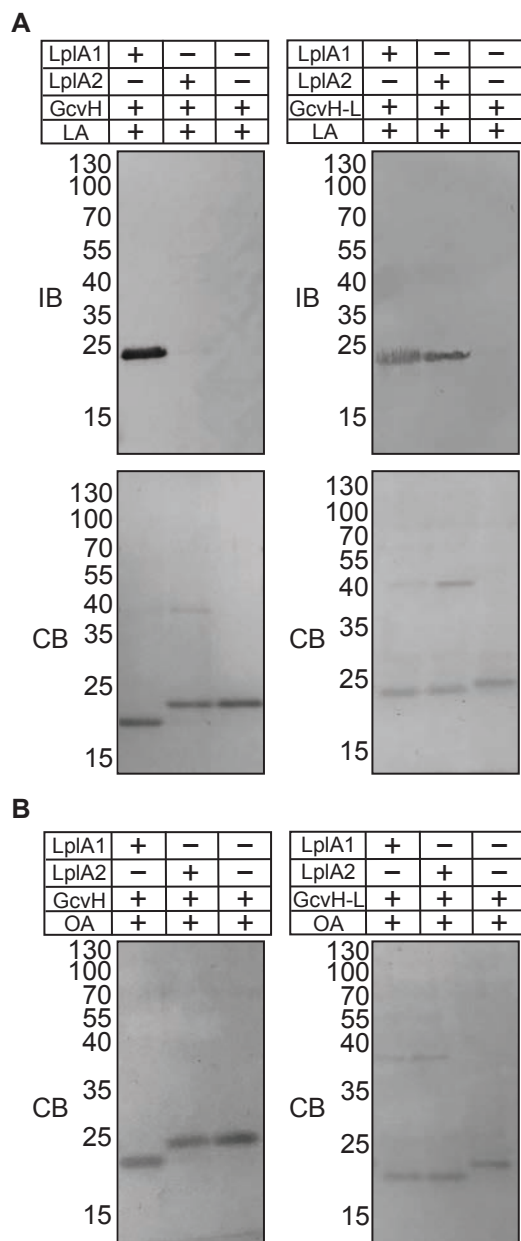

**Figure S2. Original uncropped images related to Figure 3. (A-B)** LplA1 and LplA2 attachment of **(A)** lipoic acid (2.4 mM) and **(B)** octanoic acid (2.4 mM) to GcvH and GcvH-L. Lipoylation was assessed by conducting an immunoblot (IB) with rabbit  $\alpha$ -lipoic acid antibody. Parallel 12% SDS PAGE gels were stained with GelCode Blue (CB). Octanoylation was visualized as a shift in apparent molecular weight after resolving proteins on a 12% SDS PAGE gel and staining with GelCode Blue (CB).

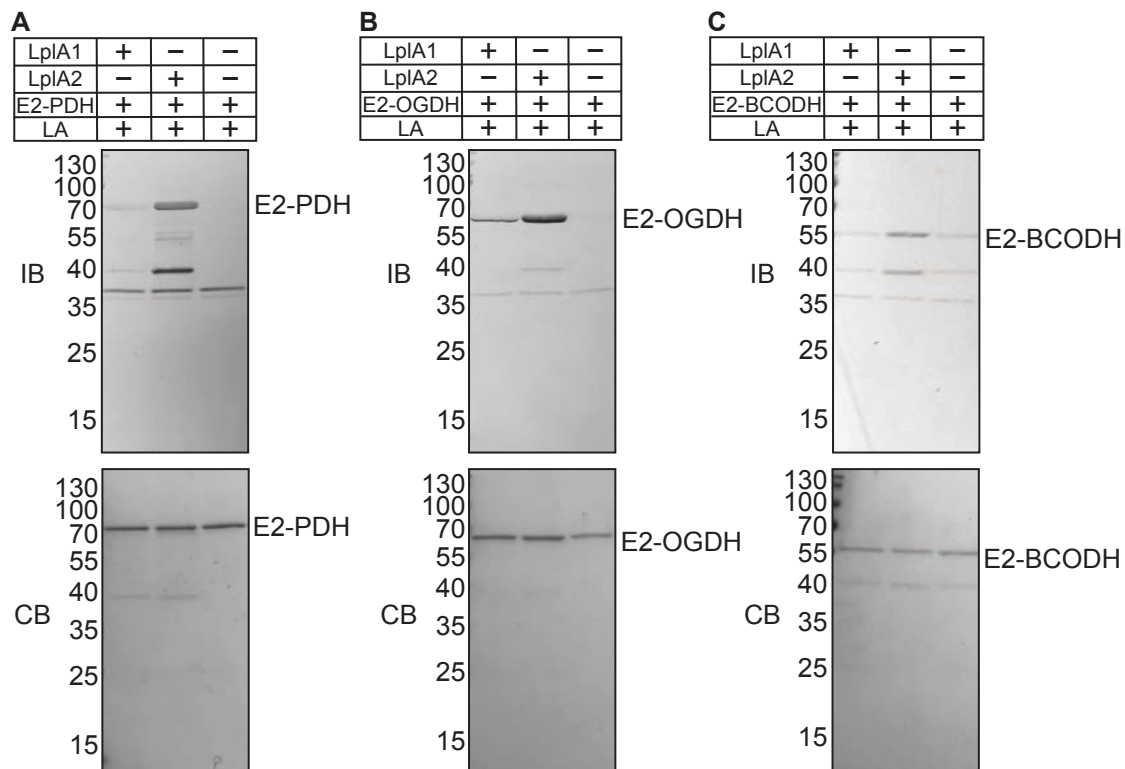

**Figure S3. Original uncropped images related to Figure 4. (A-C)** LpIA1 and LpIA2 attachment of lipoic acid (2.4 mM) to **(A)** E2-PDH, **(B)** E2-OGDH, and **(C)** E2-BCODH. Lipoylation was assessed by conducting immunoblots (IB) with rabbit  $\alpha$ -lipoic acid antibody. Parallel 12% SDS PAGE gels were stained with GelCode Blue (CB).

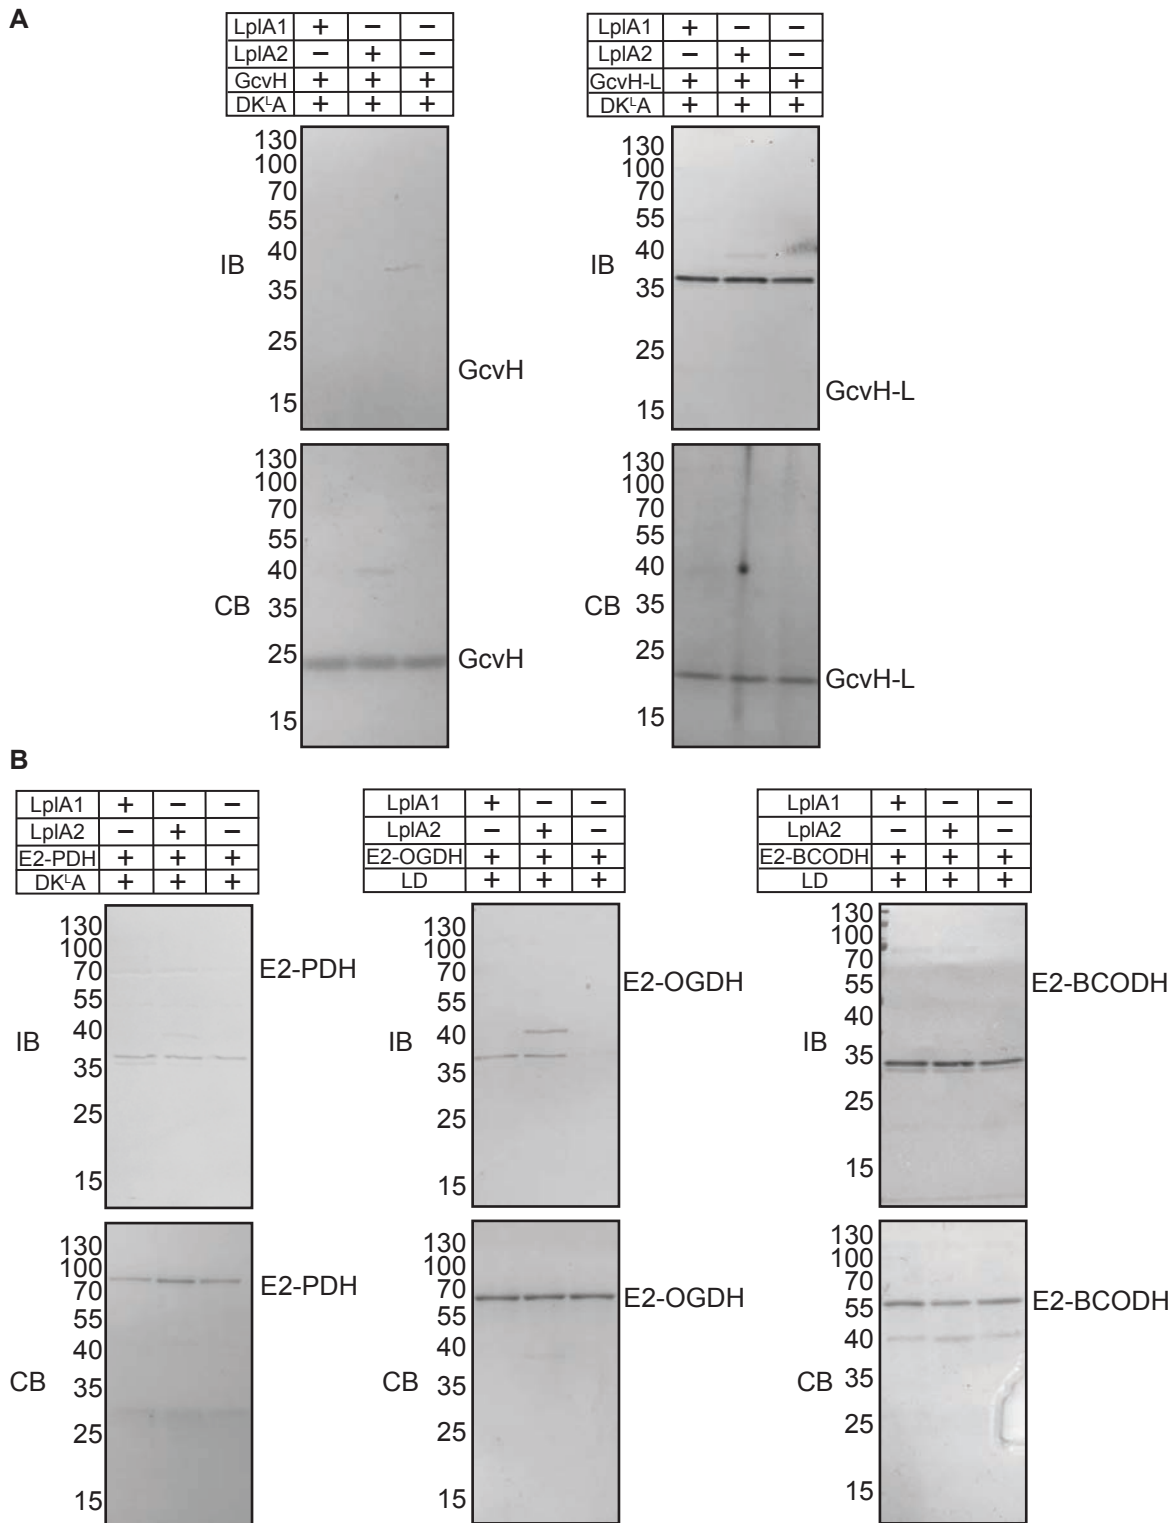

**Figure S4. Original uncropped images related to Figure 6A.** LplA1 and LplA2 attachment of DK<sup>L</sup>A tripeptide-derived lipoic acid (2.4 mM) to **(A)** GcvH and GcvH-L, or **(B)** E2-PDH, E2-OGDH, and E2-BCODH. Lipoylation was assessed by conducting immunoblots (IB) with rabbit  $\alpha$ -lipoic acid antibody. Parallel 12% SDS PAGE gels were stained with GelCode Blue (CB).

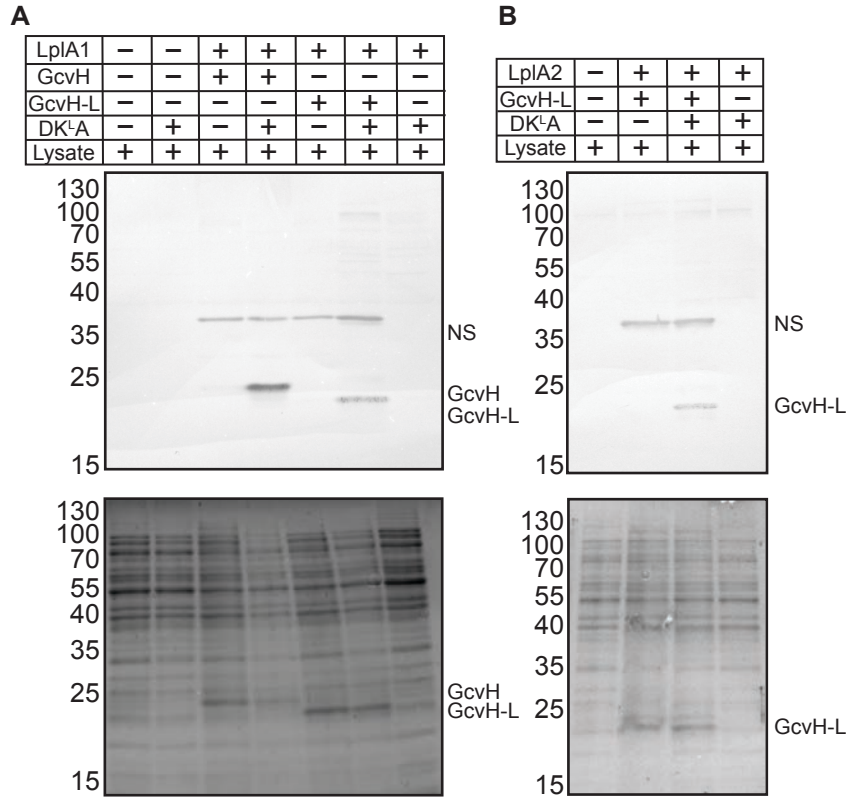

**Figure S5. Original uncropped images related to Figure 6B-C.** (A) LpIA1 attachment of DK<sup>L</sup>A tripeptide-derived lipoic acid (2.4 mM) to GcvH and GcvH-L, or (B) LpIA2 attachment of DK<sup>L</sup>A tripeptide-derived lipoic acid (2.4 mM) to GcvH-L in the presence of crude *S. aureus* lysates derived from a  $\Delta lipA \Delta lipM \Delta lipL \Delta lplA1 \Delta lplA2$  mutant. Lipoylation was assessed by conducting immunoblots (IB) with rabbit  $\alpha$ -lipoic acid antibody. Parallel 12% SDS PAGE gels were stained with GelCode Blue (CB). (NS) Non-specific, reactive band in samples containing H proteins. The positions of GcvH and GcvH-L are indicated.

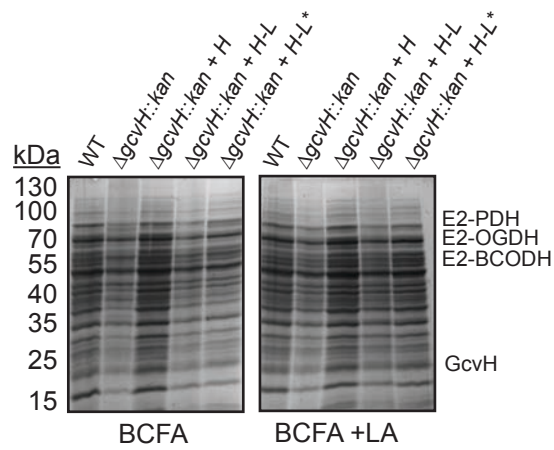

**Figure S6. Loading controls related to Figure 7.** Coomassie blue stained SDS-PAGE gels of whole cell lysates derived from the indicated strains grown in RPMI supplemented with branched chain carboxylic acids (10 mM isobutyric acid, 9 mM 2-methylbutyric acid, 9 mM isovaleric acid, and 10 mM sodium acetate - BCFA) in order to bypass the requirement of lipoic acid for replication with or without lipoic acid (LA).

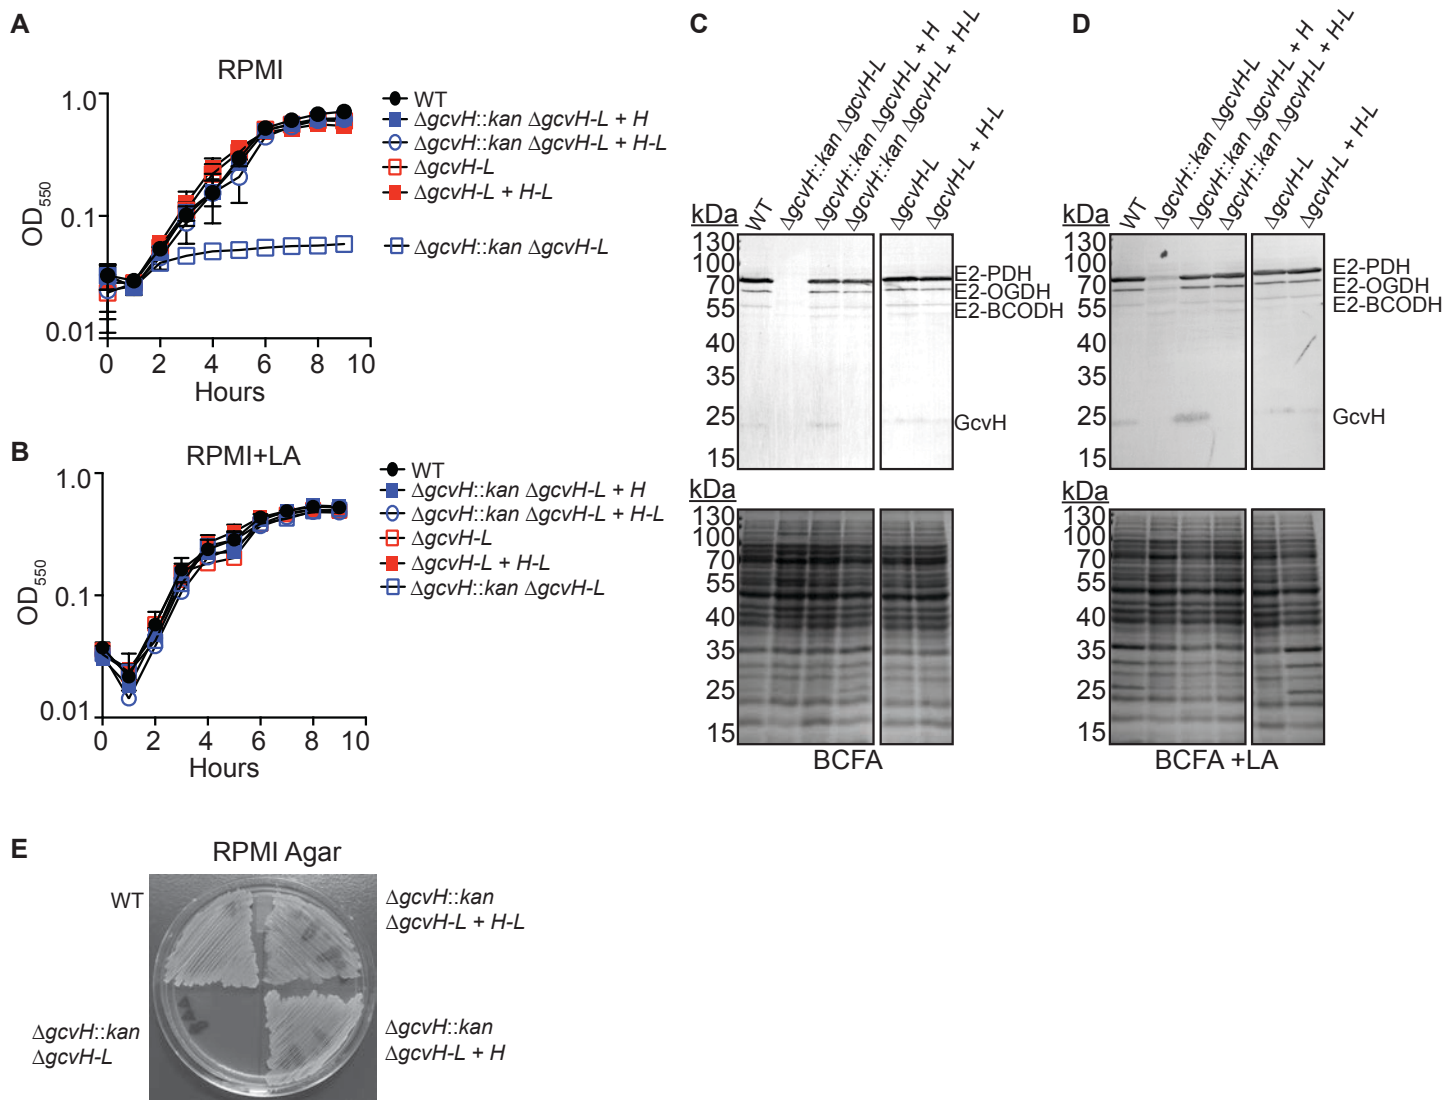

**Figure S7. GcvH and GcvH-L both participate in lipoyl relay to E2 subunits.** (A-B) Growth (OD<sub>550</sub>) of the indicated strains in (A) RPMI and (B) RPMI + 5  $\mu$ M lipiolic acid (LA). (C-D)  $\alpha$ -lipiolic acid immunoblot of whole cell lysates derived from the indicated strains grown in RPMI supplemented with branched chain carboxylic acids (10 mM isobutyric acid, 9 mM 2-methylbutyric acid, 9 mM isovaleric acid, and 10 mM sodium acetate - BCFA) in order to bypass the requirement of lipiolic acid for replication with (C) or without (D) lipiolic acid (LA). The positions of the four lipoyl proteins in *S. aureus* (E2-PDH, E2-OGDH, E2-BCODH, and GcvH) are indicated. Parallel SDS-PAGE gels were stained with GelCode Blue (lower panels). (E) Growth of the indicated strains on RPMI agar lacking free lipiolic acid.



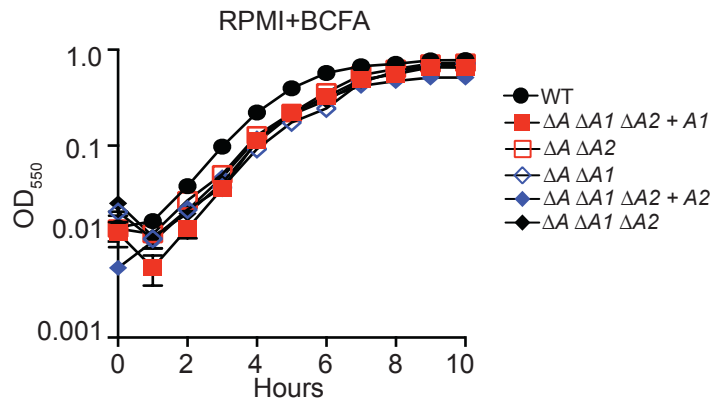

**Figure S8. Supplementation of RPMI medium with BCFA restores growth of *ΔlipA ΔlplA1* and *ΔlipA ΔlplA1 ΔlplA2 + lplA2* strains in broth culture.**

Growth (OD<sub>550</sub>) of the indicated strains in RPMI medium supplemented with 10 mM isobutyric acid, 9 mM 2-methylbutyric acid, and 9 mM isovaleric acid. Strain designations are as follows: Wildtype (WT), *ΔlipA ΔlplA1* ( $\Delta A \Delta A1$ ), *ΔlipA ΔlplA2* ( $\Delta A \Delta A2$ ), *ΔlipA ΔlplA1 ΔlplA2* ( $\Delta A \Delta A1 \Delta A2$ ), *ΔlipA ΔlplA1 ΔlplA2 + lplA1* ( $\Delta A \Delta A1 \Delta A2 + A1$ ), and *ΔlipA ΔlplA1 ΔlplA2 + lplA2* ( $\Delta A \Delta A1 \Delta A2 + A2$ ).
